# Supplementary material for: Anti-Candidal Activity of the Parasitic Plant Orobanche crenata Forssk
Source: MDPI journal article supplement (doi:10.3390/antibiotics10111373), 2021-11-09
Supplement: s1 [file s1]

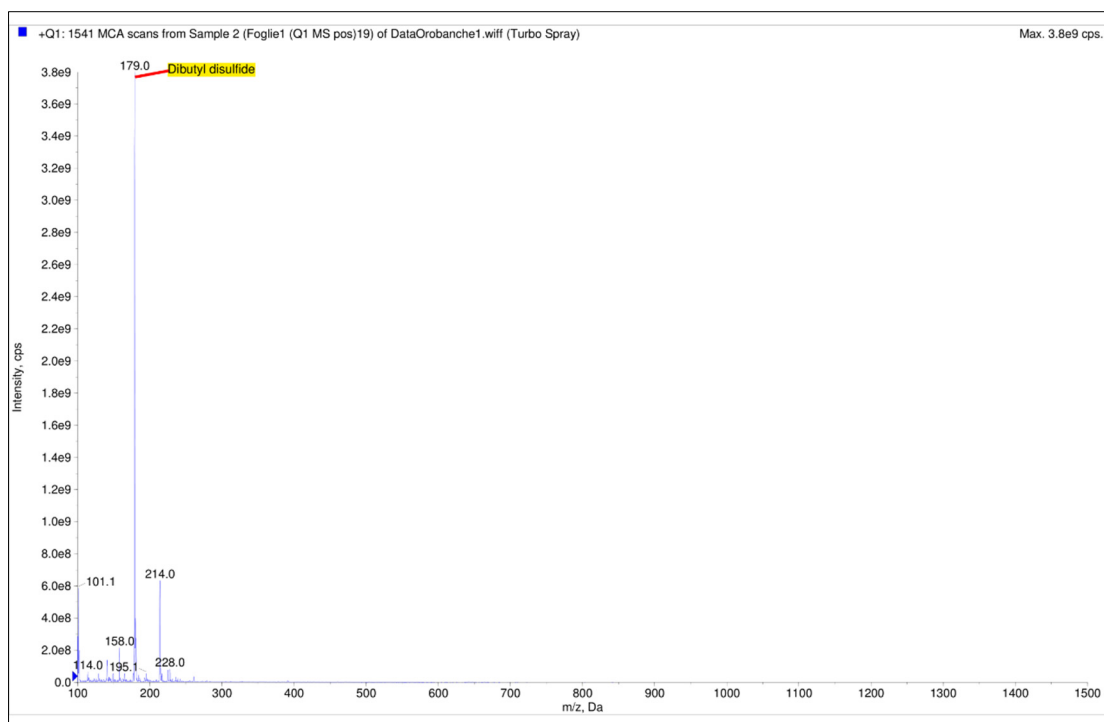

**Figure S1.** Tandem mass spectrum of *O. crenata* leaf extract in positive ion mode (m/z 100-1500 Da).

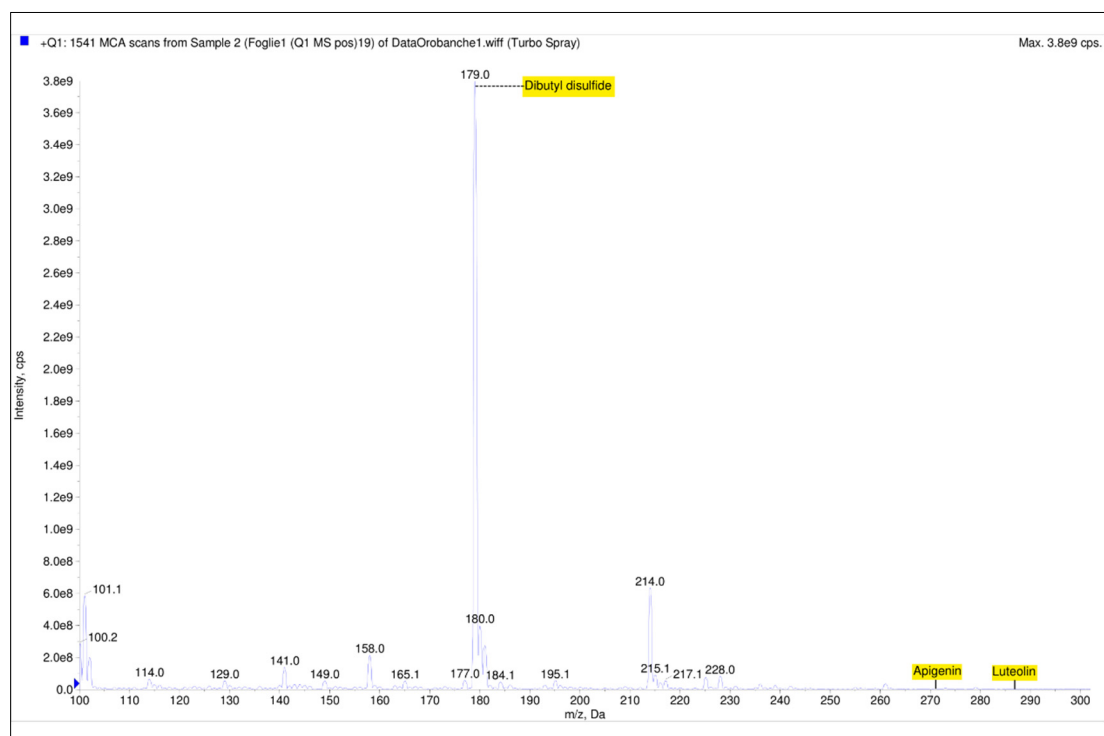

**Figure S2.** Tandem mass spectrum of *O. crenata* leaf extract in positive ion mode (m/z 100-300 Da).

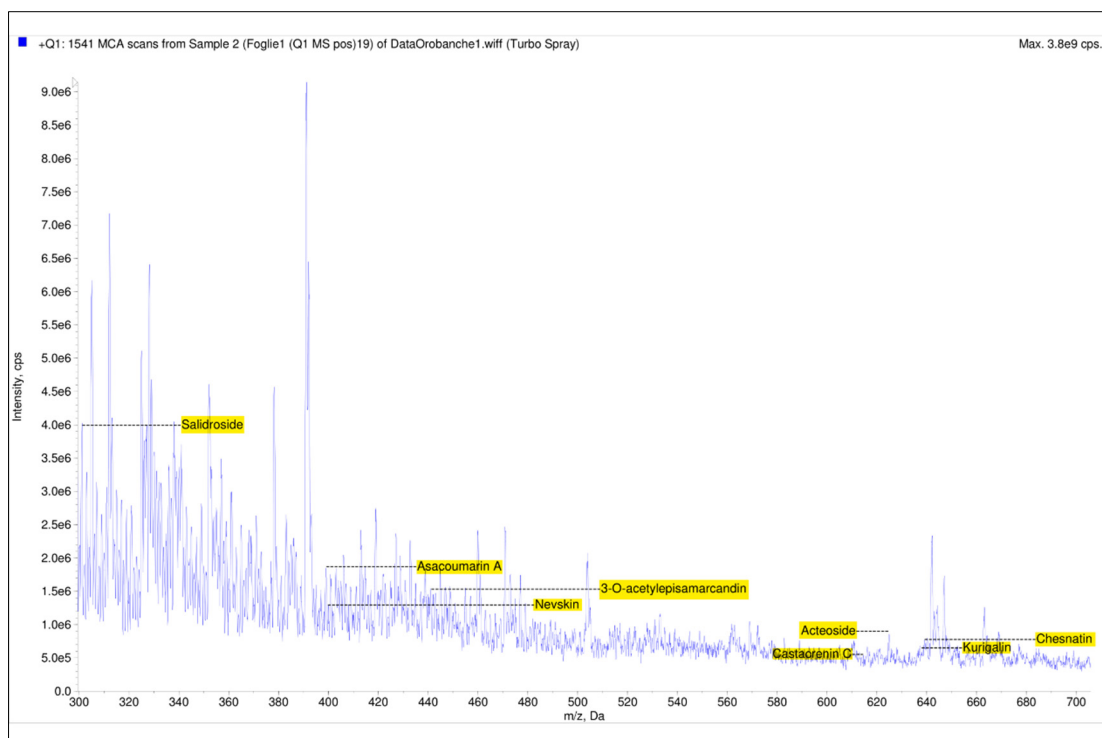

**Figure S3.** Tandem mass spectrum of *O. crenata* leaf extract in positive ion mode (m/z 300-700 Da).

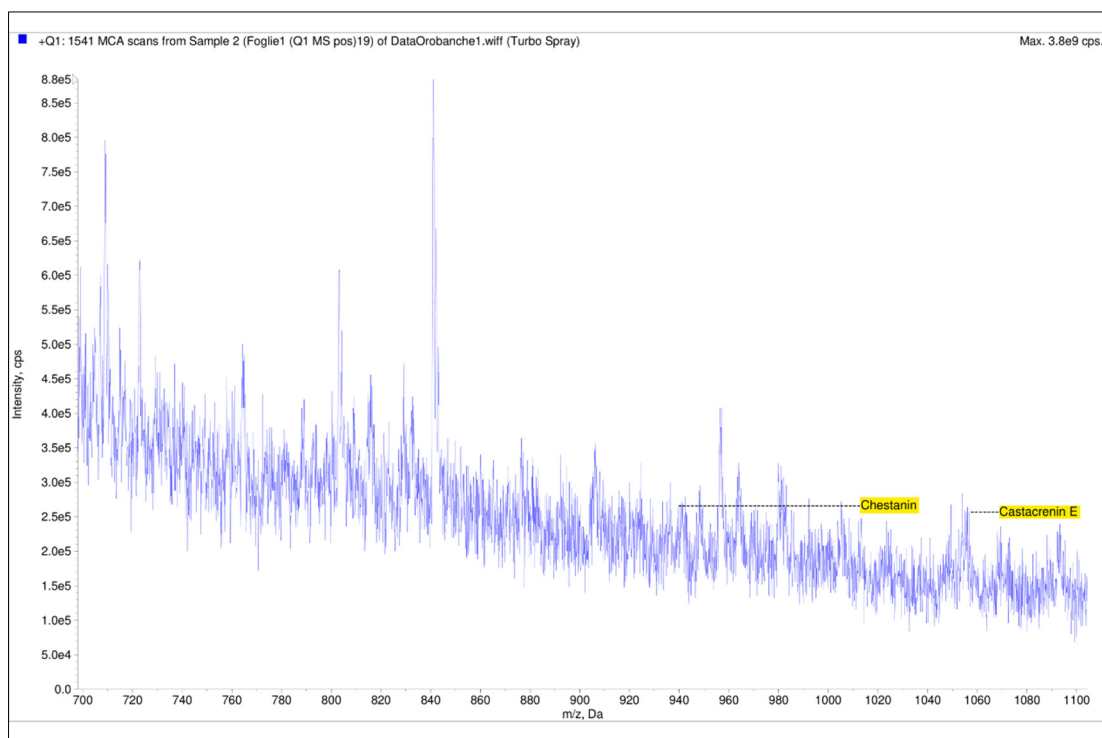

**Figure S4.** Tandem mass spectrum of *O. crenata* leaf extract in positive ion mode (m/z 700-1100 Da).

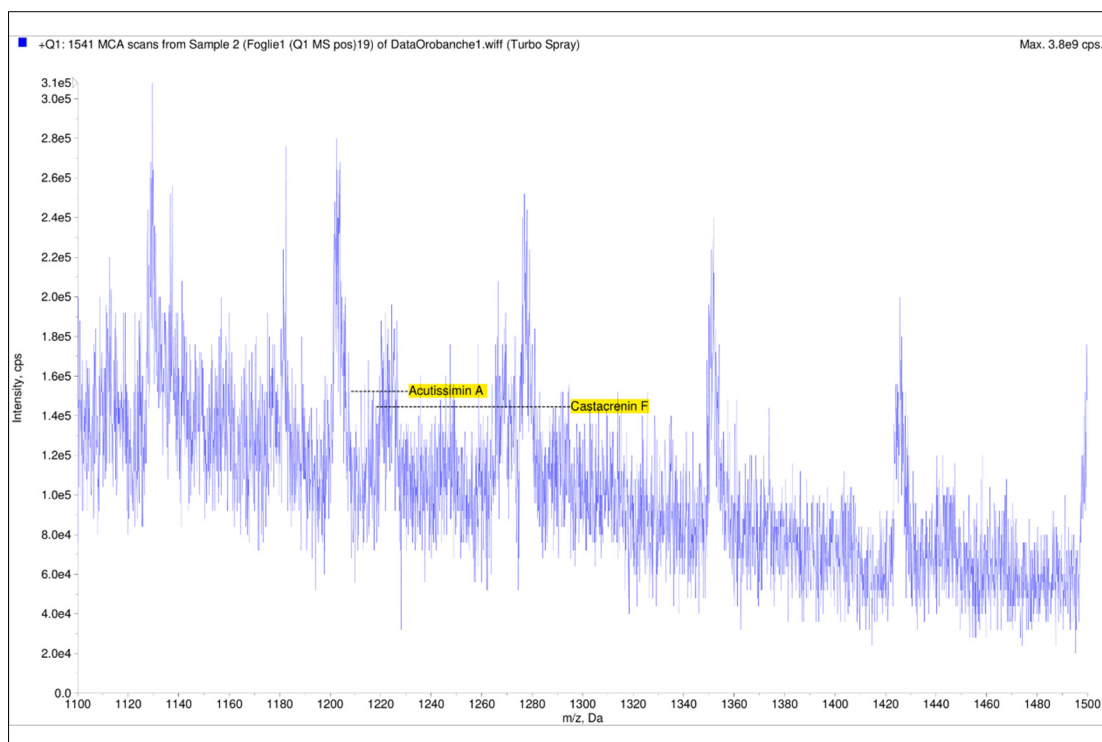

**Figure S5.** Tandem mass spectrum of *O. crenata* leaf extract in positive ion mode (m/z 1100-1500 Da).

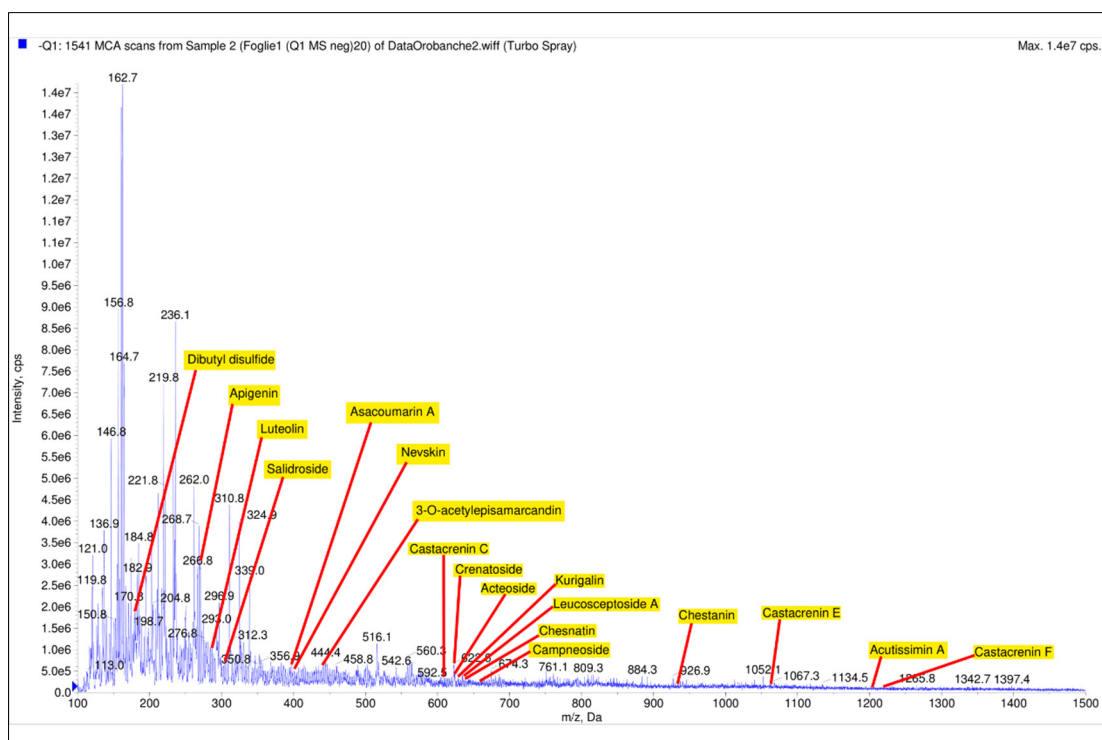

**Figure S6.** Tandem mass spectrum of *O. crenata* leaf extract in negative ion mode (m/z 100-1500 Da).

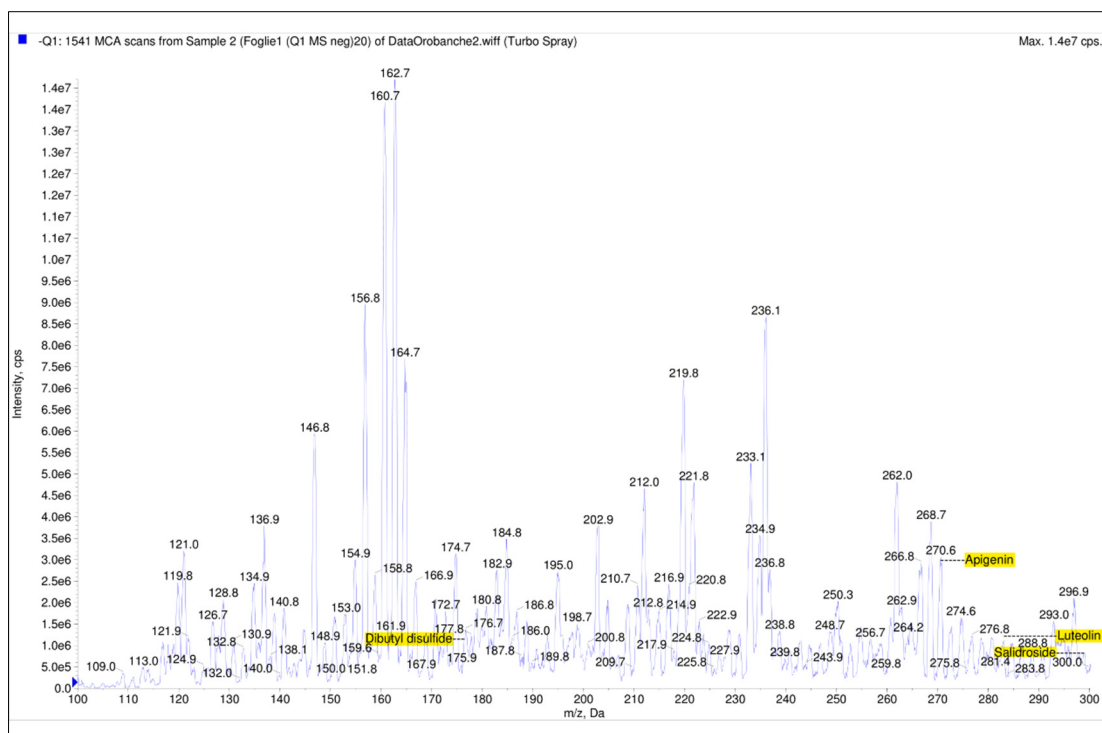

**Figure S7.** Tandem mass spectrum of *O. crenata* leaf extract in negative ion mode (m/z 100-300 Da).

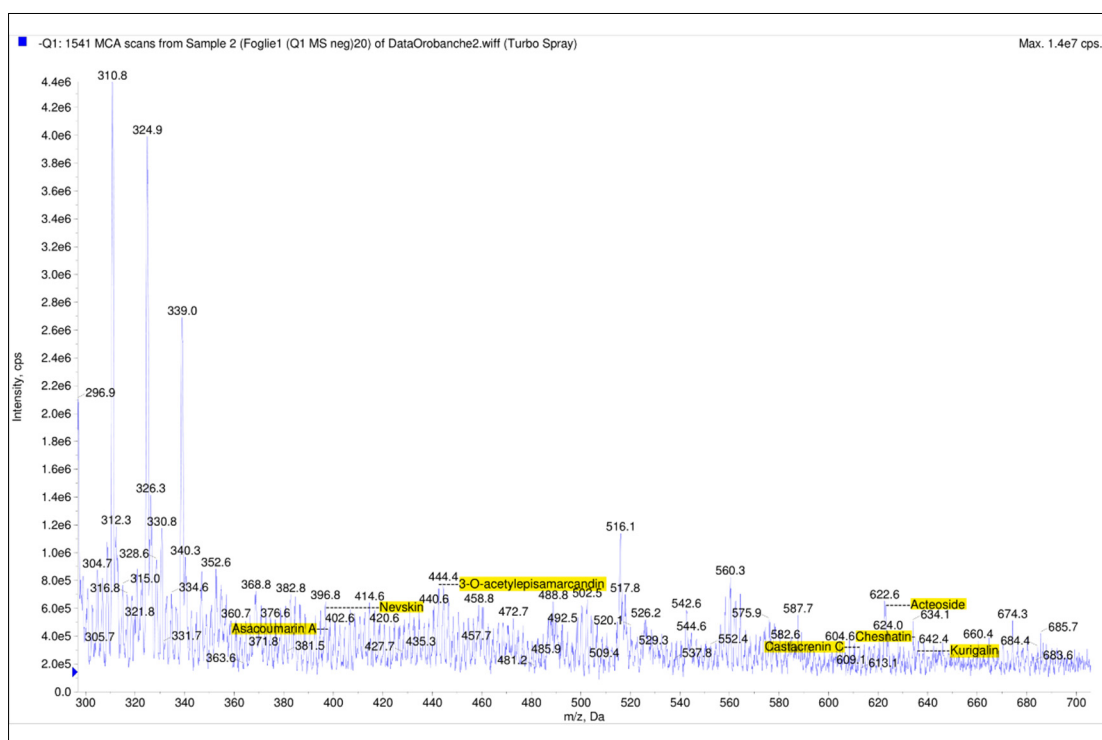

**Figure S8.** Tandem mass spectrum of *O. crenata* leaf extract in negative ion mode (m/z 300-700 Da).

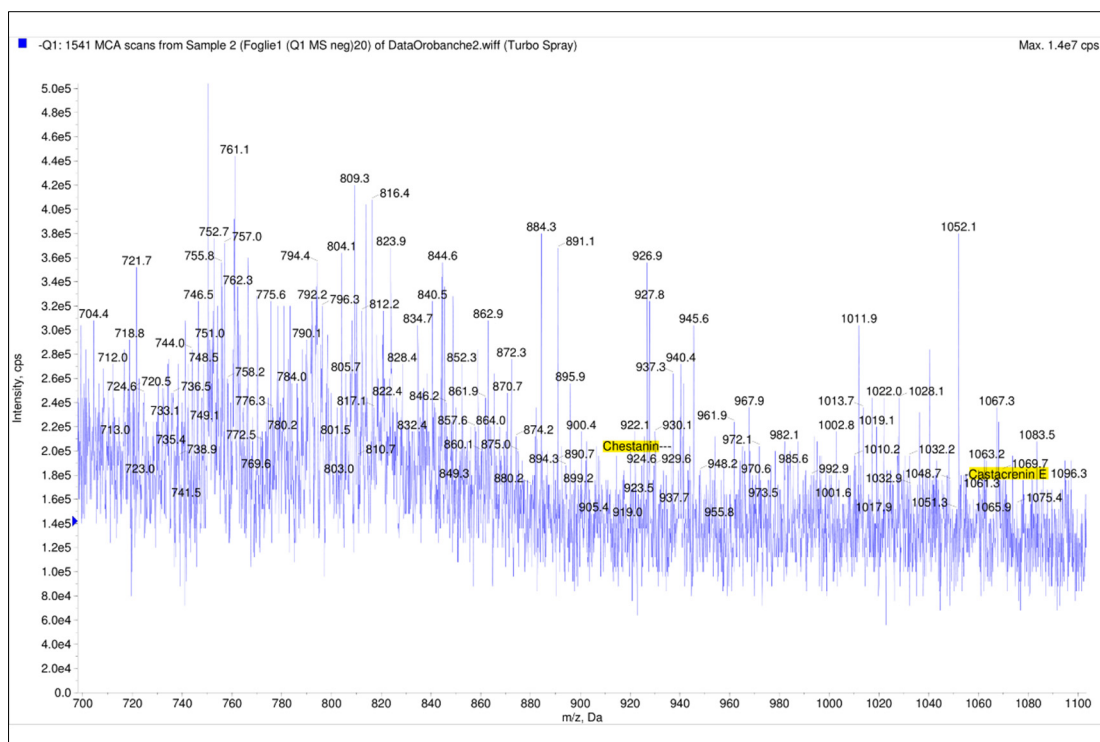

**Figure S9.** Tandem mass spectrum of *O. crenata* leaf extract in negative ion mode (m/z 700-1100 Da).

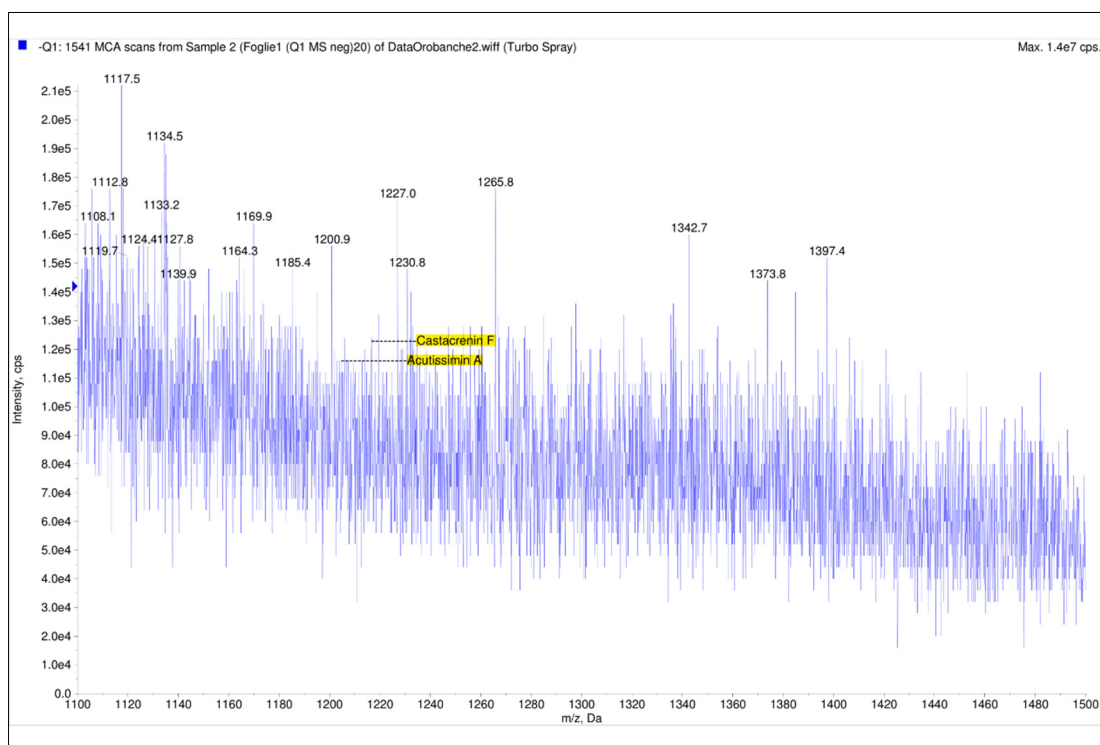

**Figure S10.** Tandem mass spectrum of *O. crenata* leaf extract in negative ion mode (m/z 1100-1500 Da).

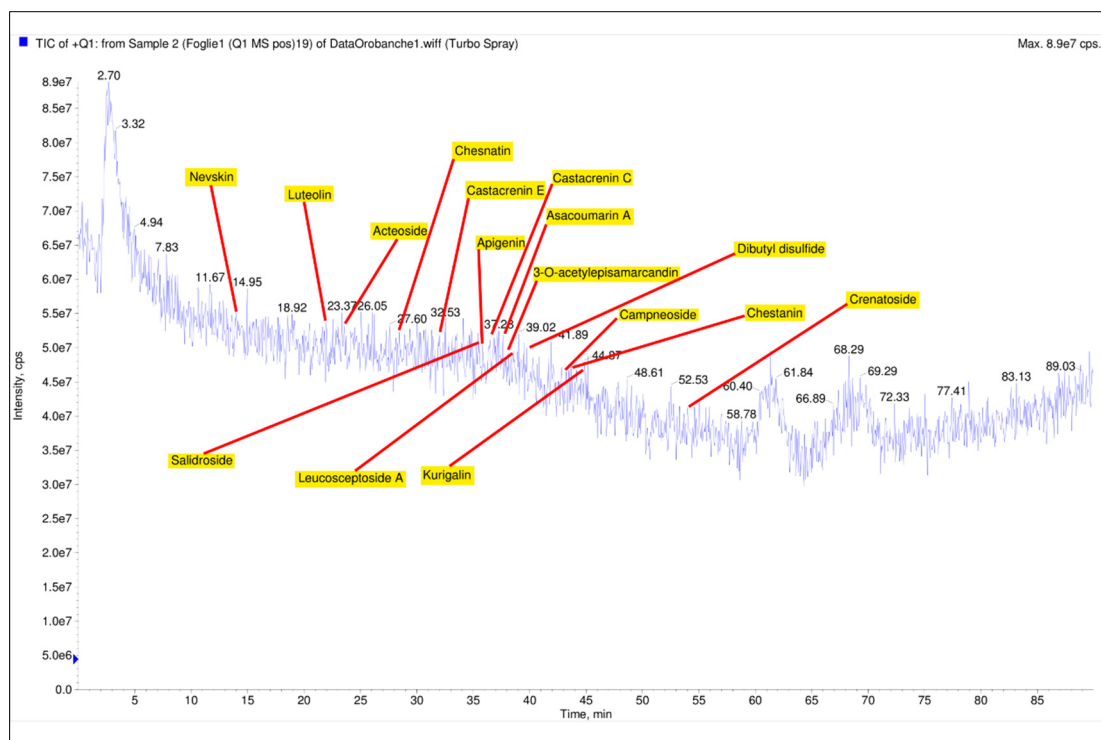

**Figure S11.** Chromatogram of *O. crenata* leaf extract by UPLC-MS/MS in positive ion mode.

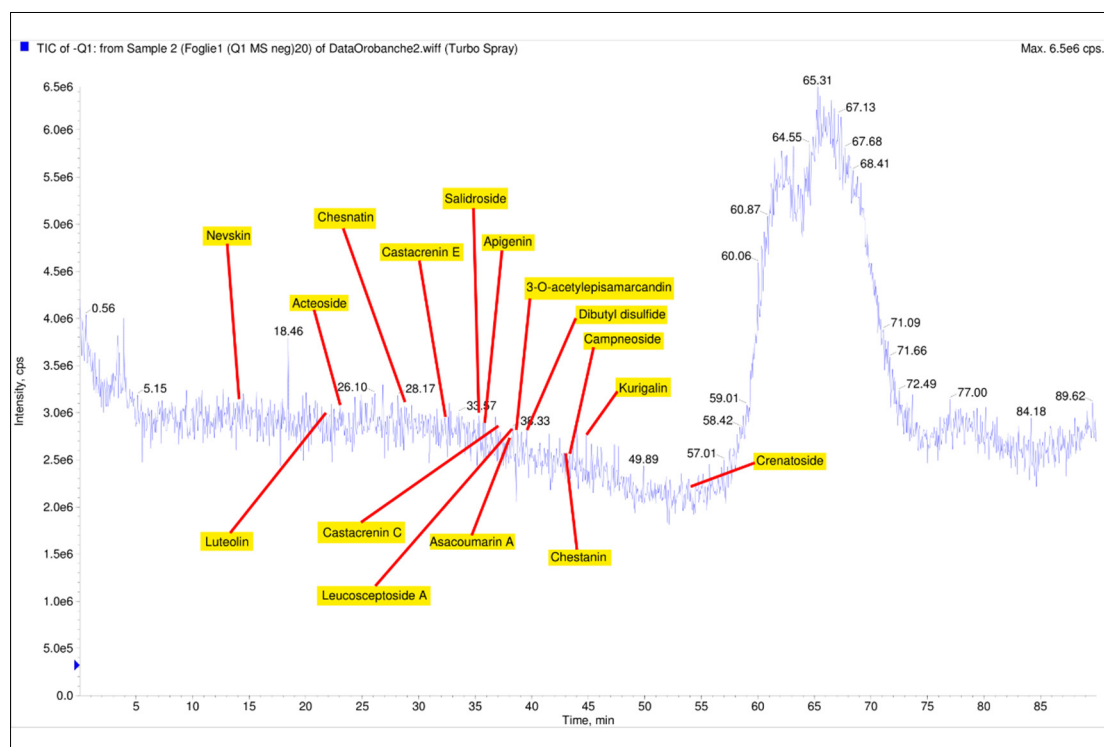

**Figure S12.** Chromatogram of *O. crenata* leaf extract by UPLC-MS/MS in negative ion mode.
